# Supplementary material
Source: Springer Nature journal article supplement (https://www.springermedizin.de/resource/supplementary/13256_2010_1312_MOESM2_ESM.pdf/9647474)
Supplement: MOESM2 [file 9647474]

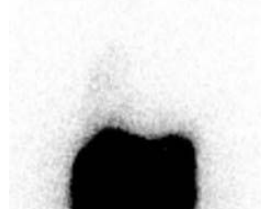

15 MIN

Anterior

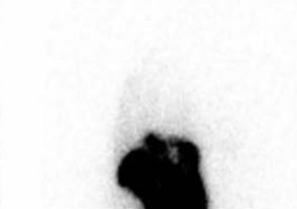

20 MIN

RT Lateral

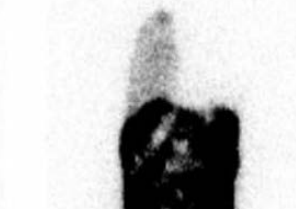

45 MIN

Anterior Post Drain

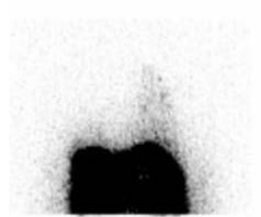

15 MIN

Posterior

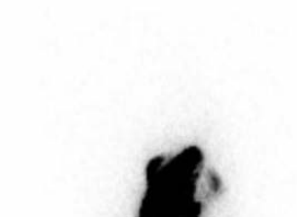

20 MIN

LT Lateral

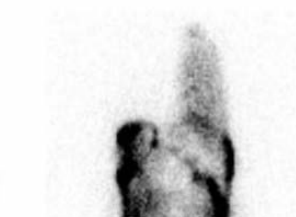

45 MIN

Posterior Post Drain
